# Supplementary material for: Chorioamnionitis Precipitates Perinatal Alterations of Heme-Oxygenase-1 (HO-1) Homeostasis in the Developing Rat Brain
Source: MDPI journal article supplement (doi:10.3390/ijms22115773), 2021-05-28
Supplement: s1 [file s1]

**Supplemental Figure 1. Determination of intraamniotic LPS treatment effect.** 2-way ANOVA results showing significant treatment effect of CHORIO on brain HO-1 expression (FIG S1A,  $p=0.0092$ ) but not on HO-2 or TfR1. Whereas, HO-2 (FIG S1B) and TfR1 (FIG S1C) were regulated significantly by postnatal age but not by treatment effect.  $p$  significant when  $<0.05$ , 2-way ANOVA, Mean $\pm$ SEM.
